# Supplementary material
Source: Springer Nature journal article supplement (https://www.springermedizin.de/resource/supplementary/12902_2008_65_MOESM1_ESM.pdf/9516206)

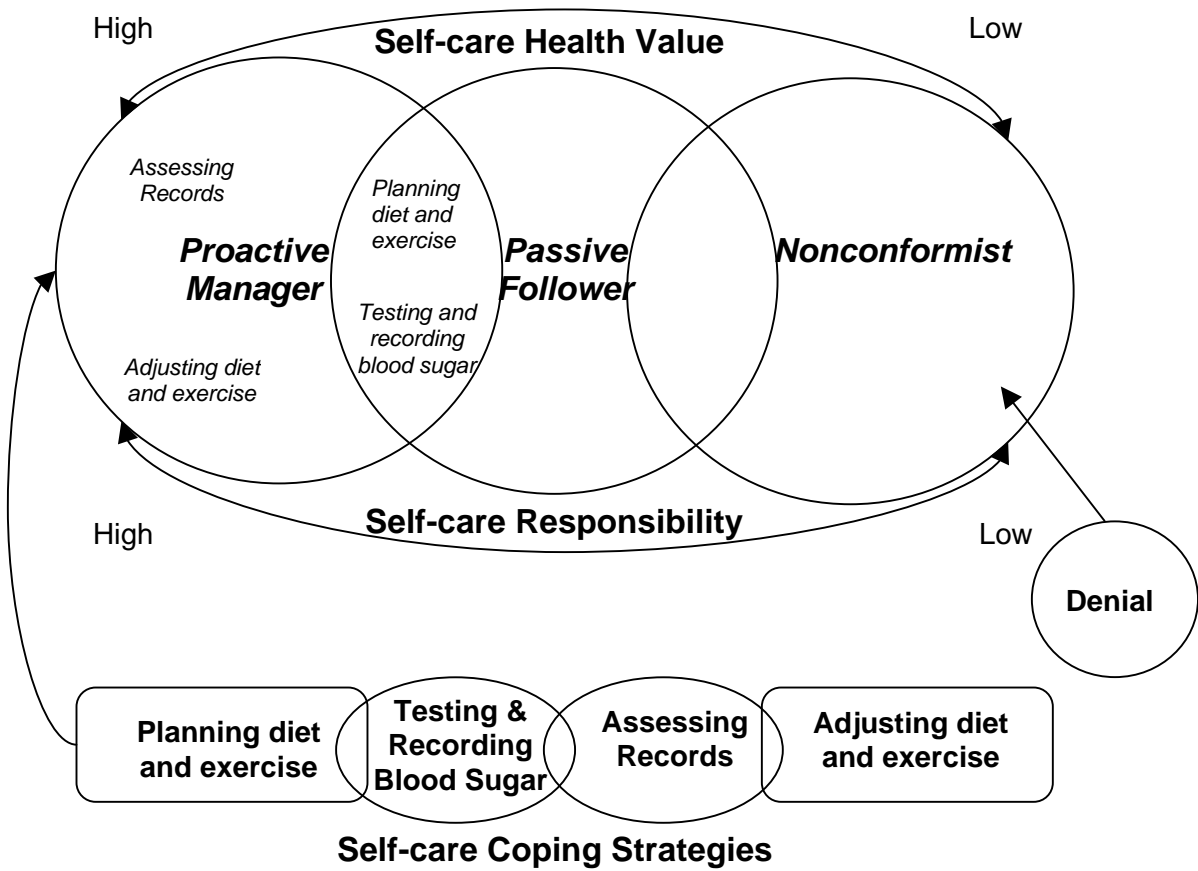

Supplement: MOESM1 [file 9516206]
